# Supplementary material
Source: PubMed Central journal article supplement (PMC1904371)
Supplement: pcbi.0030100.sg001.pdf [file pcbi.0030100.sg001.pdf]

| Model Architecture               | Model Number |
|----------------------------------|--------------|
| HG → STS → PT                    | 17           |
| HG → STS ▲ → PT                  | 18           |
| HG ▲ → STS → PT                  | 19           |
| HG ▲ → STS ▲ → PT                | 20           |
| HG ← STS ← PT<br>↔ ↔             | 21           |
| HG ← STS ← PT<br>▲ ↔ ↔           | 22           |
| HG ← STS ← PT<br>▲ ↔ ↔           | 23           |
| HG ← STS ← PT<br>▲ ▲ ↔ ↔         | 24           |
| HG ← STS ← PT<br>↔ ▲ ↔           | 25           |
| HG ← STS ← PT<br>▲ ↔ ▲ ↔         | 26           |
| HG ← STS ← PT<br>▲ ▲ ↔ ▲ ↔       | 27           |
| HG ← STS ← PT<br>▲ ▲ ↔ ▲ ↔       | 28           |
| HG ← STS ← PT<br>↔ ▲ ▲ ↔         | 29           |
| HG ← STS ← PT<br>↔ ▲ ▲ ↔         | 30           |
| HG ← STS ← PT<br>▲ ▲ ↔ ▲ ↔       | 31           |
| HG ← STS ← PT<br>▲ ▲ ↔ ▲ ▲ ↔     | 32           |
| HG ← STS ← PT<br>↔ ▲ ▲ ↔ ▲ ▲ ↔   | 33           |
| HG ← STS ← PT<br>▲ ▲ ↔ ▲ ▲ ↔     | 34           |
| HG ← STS ← PT<br>▲ ▲ ▲ ↔ ▲ ▲ ↔   | 35           |
| HG ← STS ← PT<br>▲ ▲ ▲ ▲ ↔ ▲ ▲ ↔ | 36           |
| HG → PT → STS                    | 37           |
| HG ← PT ← STS<br>↔ ↔             | 38           |
| HG ← PT ← STS<br>▲ ↔ ↔           | 39           |
| HG ← PT ← STS<br>▲ ▲ ↔ ↔         | 40           |

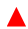

|                                                                                                                                                                                                                                                                                                                                                                                                             |    |
|-------------------------------------------------------------------------------------------------------------------------------------------------------------------------------------------------------------------------------------------------------------------------------------------------------------------------------------------------------------------------------------------------------------|----|
| HG $\leftarrow$  $\rightarrow$ PT $\leftarrow$ $\rightarrow$ STS                                                                                                                                                                                                                                                           | 41 |
| HG $\leftarrow$ $\rightarrow$ PT $\leftarrow$  $\rightarrow$ STS                                                                                                                                                                                                                                                           | 42 |
| HG $\leftarrow$  $\rightarrow$ PT $\leftarrow$  $\rightarrow$ STS                                                                                                                                                                         | 43 |
| HG $\leftarrow$  $\rightarrow$ PT $\leftarrow$  $\rightarrow$ STS                                                                                                                                                                         | 44 |
| HG $\leftarrow$   $\rightarrow$ PT $\leftarrow$  $\rightarrow$ STS                                                                                       | 45 |
| HG $\leftarrow$ $\rightarrow$ PT $\leftarrow$  $\rightarrow$ STS                                                                                                                                                                                                                                                           | 46 |
| HG $\leftarrow$  $\rightarrow$ PT $\leftarrow$  $\rightarrow$ STS                                                                                                                                                                         | 47 |
| HG $\leftarrow$  $\rightarrow$ PT $\leftarrow$  $\rightarrow$ STS                                                                                                                                                                         | 48 |
| HG $\leftarrow$   $\rightarrow$ PT $\leftarrow$  $\rightarrow$ STS                                                                                       | 49 |
| HG $\leftarrow$ $\rightarrow$ PT $\leftarrow$   $\rightarrow$ STS                                                                                                                                                                         | 50 |
| HG $\leftarrow$  $\rightarrow$ PT $\leftarrow$   $\rightarrow$ STS                                                                                       | 51 |
| HG $\leftarrow$  $\rightarrow$ PT $\leftarrow$   $\rightarrow$ STS                                                                                       | 52 |
| HG $\leftarrow$   $\rightarrow$ PT $\leftarrow$   $\rightarrow$ STS | 53 |
| HG $\rightarrow$ PT                                                                                                                                                                                                                                                                                                                                                                                         | 54 |
| $\downarrow$                                                                                                                                                                                                                                                                                                                                                                                                |    |
| STS                                                                                                                                                                                                                                                                                                                                                                                                         |    |
| HG $\leftarrow$ $\rightarrow$ PT                                                                                                                                                                                                                                                                                                                                                                            | 55 |
| $\downarrow$ $\uparrow$                                                                                                                                                                                                                                                                                                                                                                                     |    |
| STS                                                                                                                                                                                                                                                                                                                                                                                                         |    |
| HG $\leftarrow$  $\rightarrow$ PT                                                                                                                                                                                                                                                                                        | 56 |
| $\downarrow$ $\uparrow$                                                                                                                                                                                                                                                                                                                                                                                     |    |
| STS                                                                                                                                                                                                                                                                                                                                                                                                         |    |
| HG $\leftarrow$  $\rightarrow$ PT                                                                                                                                                                                                                                                                                        | 57 |
| $\downarrow$ $\uparrow$                                                                                                                                                                                                                                                                                                                                                                                     |    |
| STS                                                                                                                                                                                                                                                                                                                                                                                                         |    |

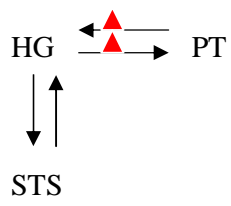

58

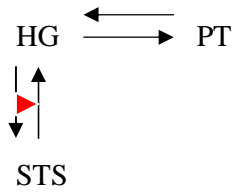

59

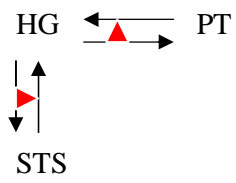

60

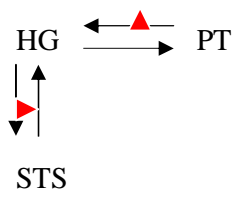

61

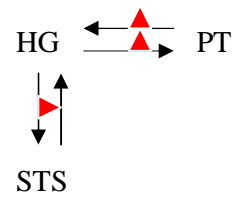

62

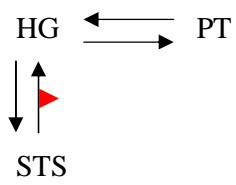

63

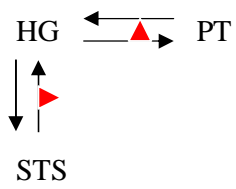

64

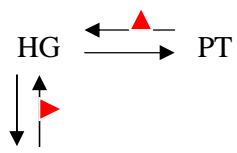

65

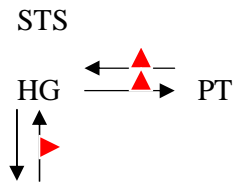

66

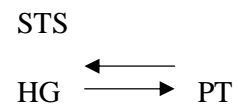

67

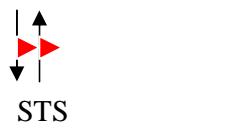

68

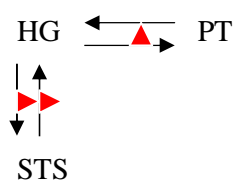

68

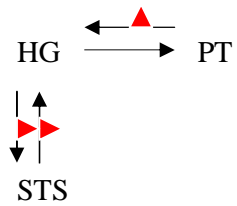

69

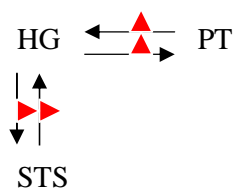

70
