# Supplementary material
Source: PubMed Central journal article supplement (PMC1904371)

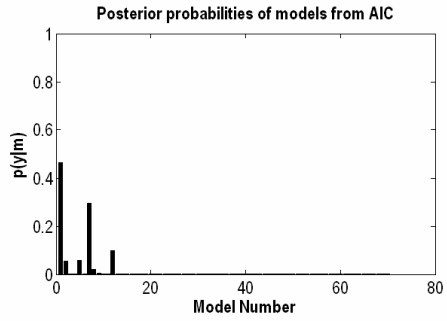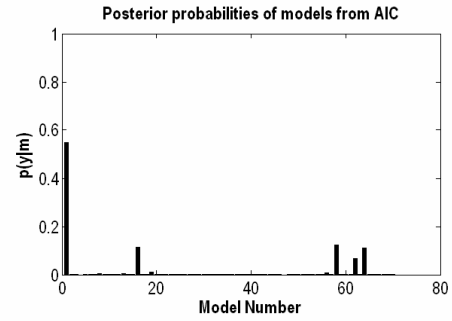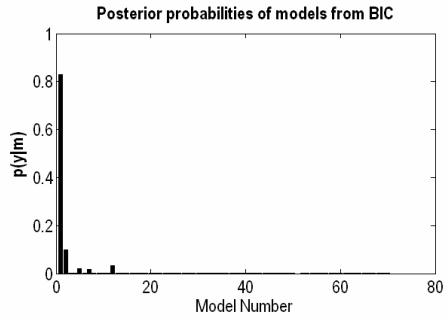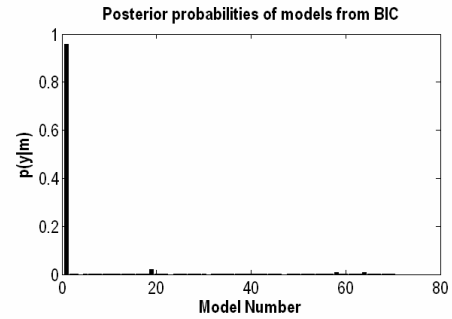

**Subject 1**

**Subject 2**

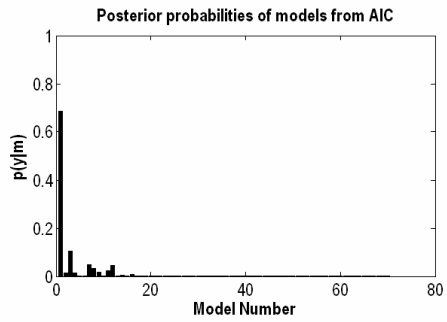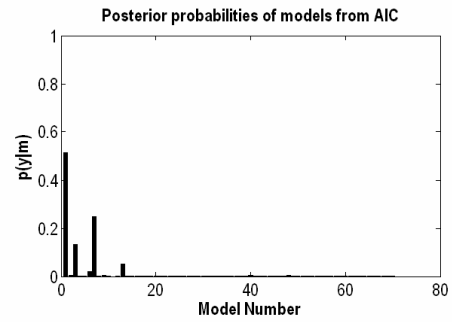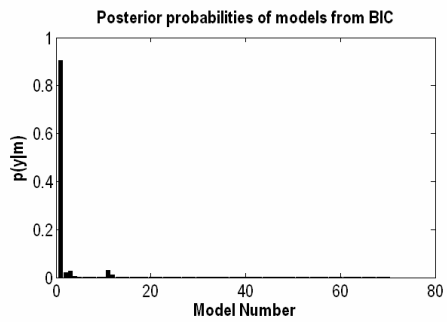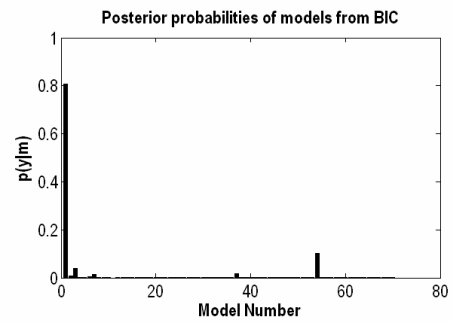

**Subject 3**

**Subject 4**

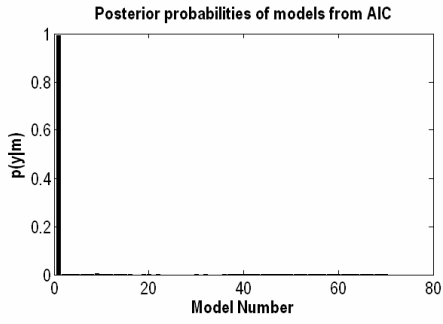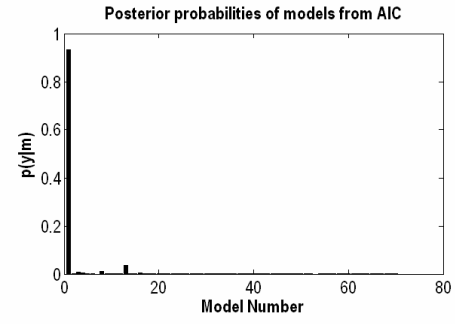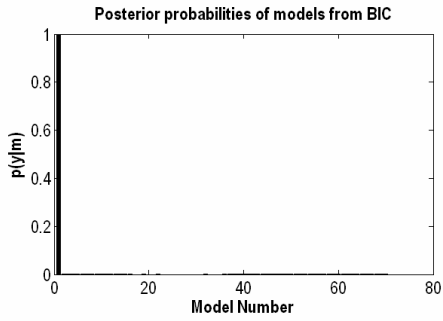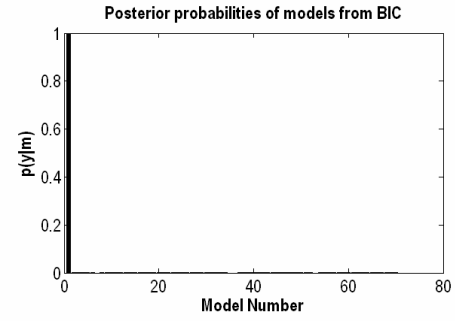

**Subject 5**

**Subject 6**

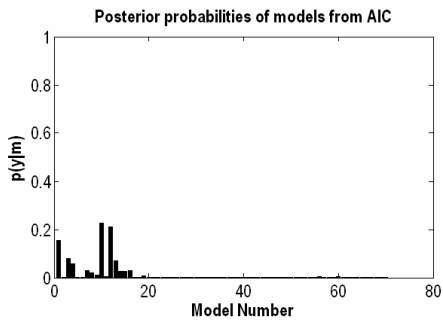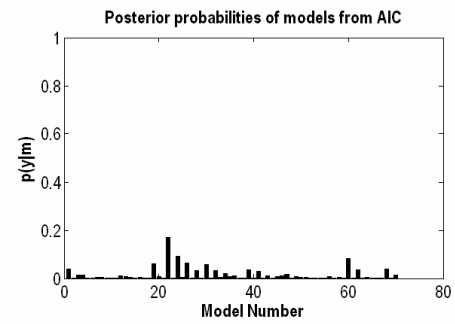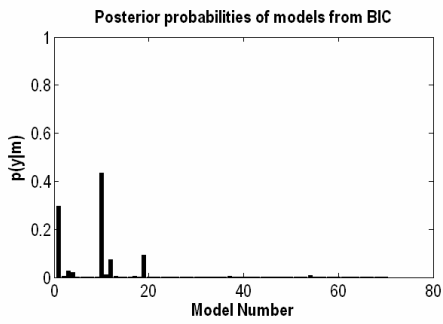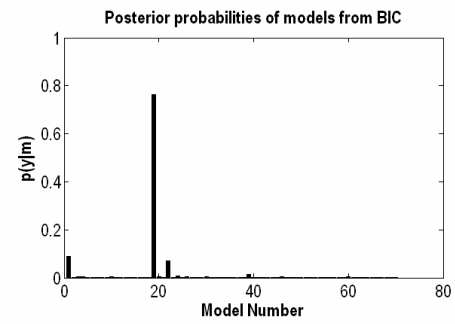

**Subject 7**

**Subject 8**

Supplement: pcbi.0030100.sg002.pdf [file pcbi.0030100.sg002.pdf]
